# Supplementary material for: Covariance of Charged Amino Acids at Positions 322 and 440 of HIV-1 Env Contributes to Coreceptor Specificity of Subtype B Viruses, and Can Be Used to Improve the Performance of V3 Sequence-Based Coreceptor Usage Prediction Algorithms
Source: PubMed Central journal article supplement (PMC4196930; doi:10.1371/journal.pone.0109771), 2014-10-14
Supplement: pone.0109771.s003.pdf [file pone.0109771.s003.pdf]

**Table S2. Performance of genotypic algorithms modified to include the “440 rule”.**

| Genotypic algorithm               | C-HIV        |              |                      | D-HIV        |              |                      | AE-HIV      |             |                       |
|-----------------------------------|--------------|--------------|----------------------|--------------|--------------|----------------------|-------------|-------------|-----------------------|
|                                   | % Sens       | % Spec       | AUROC                | % Sens       | % Spec       | AUROC                | % Sens      | % Spec      | AUROC                 |
| <b>11/25 rule</b>                 | 41.2 (+14.7) | 99 (-19)     | 0.70 (-0.02; p=0.39) | 71.4 (+13.2) | 71.7 (-22.6) | 0.72 (-0.05; p=0.30) | 65.6 (+6.3) | 99.1 (-2.8) | 0.82 (0.02; p=0.41)   |
| <b>G2P FPR 1%</b>                 | 61.8 (+2.9)  | 99.5 (-19.5) | 0.81 (-0.08; p=0.12) | 38.5 (+47.2) | 98.1 (-45.3) | 0.68 (0.01; p=0.46)  | 81.3 (+3.1) | 99.1 (-2.8) | 0.90 (0.001; p=0.49)  |
| <b>G2P FPR 2.5%</b>               | 73.5 (0)     | 99.5 (-19.5) | 0.87 (-0.1; p=0.07)  | 69.2 (+19.3) | 88.7 (-35.9) | 0.79 (-0.08; p=0.17) | 93.8 (0)    | 92.5 (-1.8) | 0.93 (-0.01; p=0.43)  |
| <b>G2P FPR 5%</b>                 | 79.4 (0)     | 97.9 (-19.4) | 0.89 (-0.1; p=0.06)  | 80.8 (+15.4) | 69.8 (-24.5) | 0.75 (-0.05; p=0.30) | 93.8 (0)    | 80.4 (-1)   | 0.87 (-0.01; p=0.47)  |
| <b>G2P FPR 5.75%</b>              | 82.4 (0)     | 97.9 (-19.4) | 0.90 (-0.1; p=0.05)  | 80.8 (+15.4) | 67.9 (-24.5) | 0.74 (-0.05; p=0.61) | 93.8 (0)    | 77.6 (-1)   | 0.86 (-0.01; p=0.47)  |
| <b>G2P FPR 10%</b>                | 82.4 (0)     | 95.4 (-19.5) | 0.89 (-0.1; p=0.06)  | 92.3 (+3.9)  | 58.5 (-18.9) | 0.75 (-0.08; p=0.20) | 96.9 (0)    | 56.1 (0)    | 0.77 (0)              |
| <b>G2P FPR 15%</b>                | 85.3 (0)     | 93.3 (-18.9) | 0.89 (-0.09; p=0.06) | 92.3 (+3.9)  | 56.6 (-17)   | 0.74 (-0.07; p=0.23) | 96.9 (0)    | 48.6 (0)    | 0.73 (0)              |
| <b>G2P FPR 20%</b>                | 85.3 (0)     | 89.2 (-18.9) | 0.87 (-0.09; p=0.07) | 92.3 (+3.9)  | 49.1 (-17)   | 0.71 (-0.07; p=0.24) | 96.9 (0)    | 40.2 (0)    | 0.69 (0; p=0.5)       |
| <b>WebPSSM<sub>X4R5</sub></b>     | -            | -            | -                    | 80.8 (+15.4) | 62.3 (-18.9) | 0.72 (-0.02; p=0.42) | 93.8 (0)    | 83.2 (-1)   | 0.89 (-0.01; p=0.47)  |
| <b>WebPSSM<sub>SI/NSI</sub></b>   | -            | -            | -                    | 71.4 (+20.9) | 75.5 (-26.4) | 0.73 (-0.03; p=0.38) | 93.8 (0)    | 84.1 (-0.9) | 0.89 (-0.004; p=0.47) |
| <b>WebPSSM<sub>SI/NSI-C</sub></b> | 79.4 (0)     | 93.3 (-16.4) | 0.86 (-0.08; p=0.10) | -            | -            | -                    | -           | -           | -                     |
| <b>CoRSeq<sub>v3-c</sub></b>      | 100 (0)      | 76.9 (-0.5)  | 0.88 (-0.01; p=0.48) | -            | -            | -                    | -           | -           | -                     |
